# Supplementary material for: Multifaceted orogenic fluid dynamics unraveled by hydrothermal epidote
Source: Copernicus journal article supplement (doi:10.5194/ejm-36-879-2024), 2024-09-24
Supplement: Supplementary file 1 [file ejm-36-879-2024-supplement.pdf]

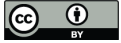

*Supplement of*

## **Multifaceted orogenic fluid dynamics unraveled by hydrothermal epidote**

**Veronica Peverelli et al.**

*Correspondence to:* Veronica Peverelli ([veronica.peverelli@unibe.ch](mailto:veronica.peverelli@unibe.ch))

The copyright of individual parts of the supplement might differ from the article licence.

## **1 U–Pb data of allanite secondary reference materials and epidote unknowns**

Sample P6b was dated during the same session as sample Gr0-e, in which AVC allanite gave a Tera–Wasserburg age of  $281.3 \pm 4.3$  Ma (anchored to the  $^{207}\text{Pb}/^{206}\text{Pb}$  value of  $0.854 \pm 0.015$  at 275 Ma of Stacey and Kramers, 1975; see the supplementary material of Peverelli et al., 2022a). Sample GE4 was dated along with sample Heyuan-1 of Peverelli et al. (2021; see their Table 3), with CAP allanite returning a Tera–Wasserburg age of  $288.5 \pm 2.9$  Ma and AVC allanite one of  $292.4 \pm 3.7$  Ma, both anchored to a  $^{207}\text{Pb}/^{206}\text{Pb}$  value of  $0.854 \pm 0.015$  (at 275 Ma; Stacey and Kramers, 1975). Samples P8, OBA19-03B and GAS19-01A were dated on 22 February 2021, with CAP allanite returning an anchored Tera–Wasserburg age of  $283.8 \pm 4.2$  Ma (Fig. A1a) and AVC allanite one of  $283.0 \pm 2.5$  Ma (Fig. A1b; both anchored to the  $^{207}\text{Pb}/^{206}\text{Pb}$  value of  $0.854 \pm 0.015$  at 275 Ma of Stacey and Kramers, 1975). Sample Planggenstock was dated on 23 February 2021, when CAP allanite yielded a Tera–Wasserburg age of  $285.6 \pm 3.2$  Ma (Fig. A1c) and AVC allanite one of  $284.1 \pm 4.1$  Ma (Fig. A1d; both anchored to the  $^{207}\text{Pb}/^{206}\text{Pb}$  value of  $0.854 \pm 0.015$  at 275 Ma of Stacey and Kramers, 1975). All AVC ages are within uncertainty of the reference U–Pb age of  $289.6 \pm 5.6$  Ma (Gregory et al., 2007). The age obtained from CAP allanite on 22 February 2021 is within the uncertainty of the reference age of  $275.0 \pm 4.7$  Ma (Gregory et al., 2007), while that calculated on 23 February 2021 is outside uncertainty of it by ca. 1 % (2.7 myr). Such a difference is negligible if compared to the uncertainties in epidote U–Pb ages of no less than 10 %.

**Table S1****Measurement conditions for U–Pb isotope data by LA-ICP-MS.**

| <b>Laboratory &amp; Sample Preparation</b>           |                                                                                                                                                                                                                                        |
|------------------------------------------------------|----------------------------------------------------------------------------------------------------------------------------------------------------------------------------------------------------------------------------------------|
| Laboratory name                                      | Institute of Geological Sciences, University of Bern (Switzerland)                                                                                                                                                                     |
| Sample type/mineral                                  | Epidote (unknowns), allanite (reference materials)                                                                                                                                                                                     |
| Sample preparation                                   | Thin sections                                                                                                                                                                                                                          |
| Imaging                                              | Backscattered electron imaging: 1 nA beam current, 20 kV acceleration voltage, working distances of 8.5–9.5 mm                                                                                                                         |
| <b>Laser ablation system</b>                         |                                                                                                                                                                                                                                        |
| Make, Model & type                                   | Resonetics RESOLutionSE 193 nm excimer laser                                                                                                                                                                                           |
| Ablation cell & volume                               | S-155 large volume constant geometry cell (Laurin Technic, Australia)                                                                                                                                                                  |
| Laser wavelength                                     | 193 nm                                                                                                                                                                                                                                 |
| Pulse width                                          | 5 nsec                                                                                                                                                                                                                                 |
| On-sample fluence                                    | 3 J cm <sup>-2</sup>                                                                                                                                                                                                                   |
| Repetition rate                                      | 5 Hz                                                                                                                                                                                                                                   |
| Ablation duration                                    | 40 sec                                                                                                                                                                                                                                 |
| Spot diameter                                        | 50 μm                                                                                                                                                                                                                                  |
| Sampling mode                                        | Static spot ablation                                                                                                                                                                                                                   |
| Carrier gas                                          | Pure He (0.4 l min <sup>-1</sup> ) and N <sub>2</sub> (0.003 l min <sup>-1</sup> ) mixed with Ar (0.86 l min <sup>-1</sup> ) immediately after the ablation cell                                                                       |
| Cell carrier gas flow                                | 0.86 l min <sup>-1</sup>                                                                                                                                                                                                               |
| <b>ICP-MS Instrument</b>                             |                                                                                                                                                                                                                                        |
| Make, Model & type                                   | Agilent 7900 single quadrupole                                                                                                                                                                                                         |
| Sample introduction                                  | Ablation aerosol with squid device                                                                                                                                                                                                     |
| RF power                                             | 1350 W (22 and 23 February 2021)                                                                                                                                                                                                       |
| Sampler, skimmer cones                               | Ni                                                                                                                                                                                                                                     |
| Detection system                                     | Single collector secondary electron multiplier                                                                                                                                                                                         |
| Data acquisition protocol                            | Time-resolved analysis                                                                                                                                                                                                                 |
| Scanning mode                                        | Peak-hopping one point per peak                                                                                                                                                                                                        |
| Detector mode                                        | Pulse counting, dead time correction applied and analog mode when signal intensity > 10 <sup>6</sup> cps                                                                                                                               |
| Masses measured                                      | 206, 207, 208, 232, 238                                                                                                                                                                                                                |
| Dwell times                                          | 40 msec (all masses)                                                                                                                                                                                                                   |
| Sweep time                                           | ca. 0.21 sec                                                                                                                                                                                                                           |
| Th/U (232/238) ratios and oxide production (248/232) | > 98 % and 0.2 %; measured on NIST 612 using a beam size 50 μm, fluence 2.5 J cm <sup>-2</sup> , repetition rate 5 Hz, scan rate 5 μm sec <sup>-1</sup>                                                                                |
| Sensitivity on mass 232                              | 6585 cps ppm <sup>-1</sup> (22 February 2021) and 6640 cps ppm <sup>-1</sup> (23 February 2021); measured on NIST 612 using a beam size 50 μm, fluence 2.5 J cm <sup>-2</sup> , repetition rate 5 Hz, scan rate 5 μm sec <sup>-1</sup> |
| IC Dead time                                         | 38 nsec                                                                                                                                                                                                                                |
| <b>Data Processing</b>                               |                                                                                                                                                                                                                                        |
| Gas blank                                            | 30 sec on-peak zero subtracted                                                                                                                                                                                                         |
| Calibration strategy                                 | Tara allanite used as primary reference material; CAP and AVC allanite used for quality control                                                                                                                                        |
| Primary reference material                           | Tara allanite (Gregory et al., 2007; Smye et al., 2014; <sup>207</sup> Pb-correction using an initial <sup>207</sup> Pb/ <sup>206</sup> Pb ratio of 0.866 ± 0.079)                                                                     |
| Data processing package                              | Iolite 7.08 and the VizualAge_UcomPbine Data Reduction Scheme (Chew et al., 2014)                                                                                                                                                      |
| Initial Pb correction                                | No initial Pb correction applied to epidote unknown and allanite secondary reference materials                                                                                                                                         |
| Uncertainty level & propagation                      | Age uncertainties are given at 95 % confidence level, and do not include propagation of long-term reproducibility of secondary standards                                                                                               |
| Quality control / Validation                         | CAP and AVC allanite (Barth et al., 1994; Gregory et al., 2007);                                                                                                                                                                       |
| <b>Other information</b>                             | The suitability of allanite as a sufficiently matrix-matched reference material for epidote U–Pb geochronology is outlined in Peverelli et al. (2021)                                                                                  |

**Table S2**

U–Pb isotope data of allanite secondary reference materials. Uncertainties are given as 2 standard errors (2 SE).  $f_{206}$  indicates the fraction of initial Pb in each measurement and it is calculated as:

$$\left( \left( {}^{207}\text{Pb}/{}^{206}\text{Pb} \right)_{\text{meas}} - \left( {}^{207}\text{Pb}/{}^{206}\text{Pb} \right)_{\text{rad}} \right) / \left( \left( {}^{207}\text{Pb}/{}^{206}\text{Pb} \right)_{\text{in}} - \left( {}^{207}\text{Pb}/{}^{206}\text{Pb} \right)_{\text{rad}} \right).$$

Error correlation (rho) is calculated as:

$$\left( \left( {}^{206}\text{Pb}/{}^{238}\text{U} \right) / 2SE_{206/238} \right) / \left( \left( \left( {}^{207}\text{Pb}/{}^{235}\text{U} \right) / 2SE_{207/235} \right) \right).$$

in = initial; meas = measured; rad = radiogenic. Mass 235 is not measured, and therefore  ${}^{235}\text{U}$  is calculated from measurements of mass 238 using the  ${}^{238}\text{U}/{}^{235}\text{U}$  ratios of 137.818 according to Hiess et al. (2012).

22 February 2021

CAP allanite

| Spot | $f_{206}$ | ${}^{238}\text{U}/{}^{206}\text{Pb}$ | 2 SE  | ${}^{207}\text{Pb}/{}^{206}\text{Pb}$ | 2 SE   | ${}^{207}\text{Pb}/{}^{235}\text{U}$ | 2 SE  | ${}^{206}\text{Pb}/{}^{238}\text{U}$ | 2 SE  | rho  | $({}^{207}\text{Pb}/{}^{206}\text{Pb})_{\text{in}}$ | $({}^{207}\text{Pb}/{}^{206}\text{Pb})_{\text{rad}}$ |
|------|-----------|--------------------------------------|-------|---------------------------------------|--------|--------------------------------------|-------|--------------------------------------|-------|------|-----------------------------------------------------|------------------------------------------------------|
| 1    | 0.17      | 18.678                               | 0.303 | 0.1845                                | 0.0029 | 1.368                                | 0.021 | 0.053                                | 0.001 | 0.95 | 0.866                                               | 0.0518                                               |
| 2    | 0.21      | 17.422                               | 0.282 | 0.2213                                | 0.0035 | 1.747                                | 0.028 | 0.057                                | 0.001 | 0.99 |                                                     |                                                      |
| 3    | 0.14      | 18.939                               | 0.294 | 0.1642                                | 0.0025 | 1.192                                | 0.018 | 0.053                                | 0.001 | 0.97 |                                                     |                                                      |
| 4    | 0.12      | 19.701                               | 0.307 | 0.1514                                | 0.0022 | 1.06                                 | 0.01  | 0.051                                | 0.001 | 0.85 |                                                     |                                                      |
| 5    | 0.19      | 17.699                               | 0.288 | 0.2067                                | 0.0035 | 1.604                                | 0.027 | 0.056                                | 0.001 | 1.0  |                                                     |                                                      |
| 6    | 0.13      | 19.120                               | 0.303 | 0.154                                 | 0.002  | 1.109                                | 0.016 | 0.052                                | 0.001 | 0.91 |                                                     |                                                      |
| 7    | 0.18      | 18.008                               | 0.289 | 0.1981                                | 0.0031 | 1.513                                | 0.024 | 0.055                                | 0.001 | 0.99 |                                                     |                                                      |
| 8    | 0.23      | 16.858                               | 0.276 | 0.2387                                | 0.0043 | 1.949                                | 0.037 | 0.059                                | 0.001 | 1.2  |                                                     |                                                      |
| 9    | 0.15      | 19.279                               | 0.301 | 0.1704                                | 0.0025 | 1.219                                | 0.017 | 0.052                                | 0.001 | 0.89 |                                                     |                                                      |
| 10   | 0.18      | 18.103                               | 0.301 | 0.1985                                | 0.0038 | 1.51                                 | 0.03  | 0.055                                | 0.001 | 1.2  |                                                     |                                                      |
| 11   | 0.21      | 17.328                               | 0.285 | 0.2237                                | 0.0039 | 1.775                                | 0.029 | 0.058                                | 0.001 | 0.99 |                                                     |                                                      |
| 12   | 0.24      | 16.537                               | 0.273 | 0.2416                                | 0.0045 | 2.015                                | 0.036 | 0.060                                | 0.001 | 1.1  |                                                     |                                                      |

AVC allanite

| Spot | $f_{206}$ | ${}^{238}\text{U}/{}^{206}\text{Pb}$ | 2 SE  | ${}^{207}\text{Pb}/{}^{206}\text{Pb}$ | 2 SE   | ${}^{207}\text{Pb}/{}^{235}\text{U}$ | 2 SE  | ${}^{206}\text{Pb}/{}^{238}\text{U}$ | 2 SE  | rho  | $({}^{207}\text{Pb}/{}^{206}\text{Pb})_{\text{in}}$ | $({}^{207}\text{Pb}/{}^{206}\text{Pb})_{\text{rad}}$ |
|------|-----------|--------------------------------------|-------|---------------------------------------|--------|--------------------------------------|-------|--------------------------------------|-------|------|-----------------------------------------------------|------------------------------------------------------|
| 1    | 0.25      | 16.989                               | 0.283 | 0.2523                                | 0.0041 | 2.043                                | 0.034 | 0.059                                | 0.001 | 1.0  | 0.854                                               | 0.0518                                               |
| 2    | 0.18      | 18.365                               | 0.287 | 0.1972                                | 0.0026 | 1.477                                | 0.018 | 0.054                                | 0.001 | 0.78 |                                                     |                                                      |
| 3    | 0.14      | 19.106                               | 0.296 | 0.1666                                | 0.0022 | 1.208                                | 0.014 | 0.052                                | 0.001 | 0.75 |                                                     |                                                      |
| 4    | 0.23      | 17.059                               | 0.274 | 0.2329                                | 0.0035 | 1.888                                | 0.026 | 0.059                                | 0.001 | 0.86 |                                                     |                                                      |
| 5    | 0.24      | 16.694                               | 0.279 | 0.2481                                | 0.0042 | 2.06                                 | 0.03  | 0.060                                | 0.001 | 0.93 |                                                     |                                                      |
| 6    | 0.28      | 15.883                               | 0.277 | 0.28                                  | 0.01   | 2.425                                | 0.046 | 0.063                                | 0.001 | 1.1  |                                                     |                                                      |
| 7    | 0.26      | 16.434                               | 0.270 | 0.2642                                | 0.0056 | 2.219                                | 0.043 | 0.061                                | 0.001 | 1.2  |                                                     |                                                      |
| 8    | 0.32      | 15.283                               | 0.257 | 0.3059                                | 0.0054 | 2.756                                | 0.043 | 0.065                                | 0.001 | 0.93 |                                                     |                                                      |
| 9    | 0.29      | 15.783                               | 0.274 | 0.2858                                | 0.0051 | 2.498                                | 0.039 | 0.063                                | 0.001 | 0.90 |                                                     |                                                      |
| 10   | 0.18      | 18.318                               | 0.292 | 0.1932                                | 0.0033 | 1.463                                | 0.025 | 0.055                                | 0.001 | 1.1  |                                                     |                                                      |

|    |      |        |       |        |        |       |       |       |       |      |
|----|------|--------|-------|--------|--------|-------|-------|-------|-------|------|
| 11 | 0.19 | 18.073 | 0.278 | 0.2057 | 0.0024 | 1.564 | 0.017 | 0.055 | 0.001 | 0.71 |
| 12 | 0.18 | 18.142 | 0.276 | 0.2001 | 0.0022 | 1.515 | 0.016 | 0.055 | 0.001 | 0.69 |
| 13 | 0.22 | 17.495 | 0.285 | 0.2303 | 0.0036 | 1.81  | 0.03  | 0.057 | 0.001 | 0.88 |
| 14 | 0.20 | 18.024 | 0.286 | 0.2083 | 0.0039 | 1.61  | 0.026 | 0.055 | 0.001 | 1.0  |
| 15 | 0.20 | 18.106 | 0.279 | 0.2148 | 0.003  | 1.646 | 0.03  | 0.055 | 0.001 | 1.0  |
| 16 | 0.21 | 17.658 | 0.306 | 0.2176 | 0.0041 | 1.716 | 0.028 | 0.057 | 0.001 | 0.94 |
| 17 | 0.21 | 17.841 | 0.286 | 0.2177 | 0.0029 | 1.681 | 0.022 | 0.056 | 0.001 | 0.81 |
| 18 | 0.16 | 18.598 | 0.301 | 0.1819 | 0.0025 | 1.36  | 0.02  | 0.054 | 0.001 | 0.91 |
| 19 | 0.24 | 16.647 | 0.277 | 0.2463 | 0.0039 | 2.039 | 0.032 | 0.060 | 0.001 | 0.94 |
| 20 | 0.20 | 17.464 | 0.281 | 0.2124 | 0.0035 | 1.692 | 0.027 | 0.057 | 0.001 | 0.99 |
| 21 | 0.18 | 17.999 | 0.311 | 0.1951 | 0.0048 | 1.509 | 0.034 | 0.056 | 0.001 | 1.3  |
| 22 | 0.29 | 15.790 | 0.274 | 0.2826 | 0.0064 | 2.484 | 0.047 | 0.063 | 0.001 | 1.1  |

23 February 2021

CAP allanite

| Spot | f206 | $^{238}\text{U}/^{206}\text{Pb}$ | 2 SE  | $^{207}\text{Pb}/^{206}\text{Pb}$ | 2 SE   | $^{207}\text{Pb}/^{235}\text{U}$ | 2 SE  | $^{206}\text{Pb}/^{238}\text{U}$ | 2 SE  | rho  | $(^{207}\text{Pb}/^{206}\text{Pb})_{\text{in}}$ | $(^{207}\text{Pb}/^{206}\text{Pb})_{\text{rad}}$ |
|------|------|----------------------------------|-------|-----------------------------------|--------|----------------------------------|-------|----------------------------------|-------|------|-------------------------------------------------|--------------------------------------------------|
| 1    | 0.16 | 18.748                           | 0.633 | 0.1804                            | 0.0033 | 1.337                            | 0.023 | 0.053                            | 0.002 | 0.51 | 0.854                                           | 0.0518                                           |
| 2    | 0.10 | 20.032                           | 0.682 | 0.1285                            | 0.0027 | 0.884                            | 0.019 | 0.050                            | 0.002 | 0.63 |                                                 |                                                  |
| 3    | 0.12 | 18.986                           | 0.649 | 0.1505                            | 0.0018 | 1.097                            | 0.012 | 0.053                            | 0.002 | 0.32 |                                                 |                                                  |
| 4    | 0.12 | 19.342                           | 0.636 | 0.1473                            | 0.0021 | 1.049                            | 0.015 | 0.052                            | 0.002 | 0.43 |                                                 |                                                  |
| 5    | 0.16 | 17.781                           | 0.601 | 0.1835                            | 0.003  | 1.431                            | 0.021 | 0.056                            | 0.002 | 0.43 |                                                 |                                                  |
| 6    | 0.12 | 19.550                           | 0.650 | 0.1487                            | 0.0022 | 1.048                            | 0.014 | 0.051                            | 0.002 | 0.40 |                                                 |                                                  |
| 7    | 0.18 | 18.430                           | 0.611 | 0.1946                            | 0.003  | 1.46                             | 0.02  | 0.054                            | 0.002 | 0.41 |                                                 |                                                  |
| 8    | 0.11 | 19.631                           | 0.655 | 0.137                             | 0.002  | 0.964                            | 0.012 | 0.051                            | 0.002 | 0.37 |                                                 |                                                  |
| 9    | 0.20 | 18.457                           | 0.613 | 0.2107                            | 0.0035 | 1.575                            | 0.023 | 0.054                            | 0.002 | 0.44 |                                                 |                                                  |
| 10   | 0.19 | 17.966                           | 0.614 | 0.203                             | 0.004  | 1.562                            | 0.026 | 0.056                            | 0.002 | 0.49 |                                                 |                                                  |
| 11   | 0.16 | 18.549                           | 0.619 | 0.1831                            | 0.0033 | 1.363                            | 0.023 | 0.054                            | 0.002 | 0.50 |                                                 |                                                  |
| 12   | 0.18 | 17.969                           | 0.613 | 0.1936                            | 0.0034 | 1.487                            | 0.024 | 0.056                            | 0.002 | 0.47 |                                                 |                                                  |
| 13   | 0.17 | 18.149                           | 0.626 | 0.1915                            | 0.0036 | 1.454                            | 0.026 | 0.055                            | 0.002 | 0.52 |                                                 |                                                  |

AVC allanite

| Spot | f206 | $^{238}\text{U}/^{206}\text{Pb}$ | 2 SE  | $^{207}\text{Pb}/^{206}\text{Pb}$ | 2 SE   | $^{207}\text{Pb}/^{235}\text{U}$ | 2 SE  | $^{206}\text{Pb}/^{238}\text{U}$ | 2 SE  | rho  | $(^{207}\text{Pb}/^{206}\text{Pb})_{\text{in}}$ | $(^{207}\text{Pb}/^{206}\text{Pb})_{\text{rad}}$ |
|------|------|----------------------------------|-------|-----------------------------------|--------|----------------------------------|-------|----------------------------------|-------|------|-------------------------------------------------|--------------------------------------------------|
| 1    |      | 17.425                           | 0.577 | 0.2298                            | 0.0037 | 1.829                            | 0.028 | 0.057                            | 0.002 | 0.46 | 0.584                                           | 0.0518                                           |
| 2    |      | 13.004                           | 0.473 | 0.3852                            | 0.0065 | 4.05                             | 0.09  | 0.077                            | 0.003 | 0.62 |                                                 |                                                  |
| 3    |      | 15.671                           | 0.540 | 0.2967                            | 0.0058 | 2.615                            | 0.047 | 0.064                            | 0.002 | 0.52 |                                                 |                                                  |
| 4    |      | 17.649                           | 0.592 | 0.229                             | 0.004  | 1.798                            | 0.034 | 0.057                            | 0.002 | 0.56 |                                                 |                                                  |
| 5    |      | 15.741                           | 0.545 | 0.284                             | 0.005  | 2.49                             | 0.04  | 0.063                            | 0.002 | 0.46 |                                                 |                                                  |
| 6    |      | 16.226                           | 0.553 | 0.2641                            | 0.0048 | 2.257                            | 0.039 | 0.062                            | 0.002 | 0.51 |                                                 |                                                  |
| 7    |      | 15.664                           | 0.540 | 0.2949                            | 0.0055 | 2.599                            | 0.041 | 0.064                            | 0.002 | 0.46 |                                                 |                                                  |
| 8    |      | 16.889                           | 0.570 | 0.2528                            | 0.0055 | 2.076                            | 0.044 | 0.059                            | 0.002 | 0.63 |                                                 |                                                  |
| 9    |      | 15.126                           | 0.526 | 0.306                             | 0.006  | 2.805                            | 0.051 | 0.066                            | 0.002 | 0.52 |                                                 |                                                  |
| 10   |      | 14.932                           | 0.513 | 0.3146                            | 0.0066 | 2.908                            | 0.052 | 0.067                            | 0.002 | 0.52 |                                                 |                                                  |
| 11   |      | 16.401                           | 0.565 | 0.2676                            | 0.0059 | 2.255                            | 0.045 | 0.061                            | 0.002 | 0.58 |                                                 |                                                  |

|    |        |       |        |        |       |       |       |       |      |
|----|--------|-------|--------|--------|-------|-------|-------|-------|------|
| 12 | 15.906 | 0.557 | 0.2837 | 0.0054 | 2.47  | 0.04  | 0.063 | 0.002 | 0.49 |
| 13 | 15.456 | 0.525 | 0.288  | 0.006  | 2.59  | 0.05  | 0.065 | 0.002 | 0.56 |
| 14 | 17.206 | 0.592 | 0.2209 | 0.0049 | 1.762 | 0.034 | 0.058 | 0.002 | 0.56 |
| 15 | 19.066 | 0.654 | 0.1632 | 0.0024 | 1.185 | 0.015 | 0.052 | 0.002 | 0.37 |
| 16 | 16.439 | 0.567 | 0.2473 | 0.0037 | 2.078 | 0.028 | 0.061 | 0.002 | 0.39 |
| 17 | 17.188 | 0.591 | 0.2252 | 0.0045 | 1.805 | 0.034 | 0.058 | 0.002 | 0.55 |
| 18 | 15.456 | 0.525 | 0.295  | 0.007  | 2.638 | 0.058 | 0.065 | 0.002 | 0.65 |
| 19 | 15.627 | 0.537 | 0.2852 | 0.0065 | 2.515 | 0.048 | 0.064 | 0.002 | 0.55 |
| 20 | 15.723 | 0.569 | 0.3005 | 0.0078 | 2.622 | 0.065 | 0.064 | 0.002 | 0.68 |
| 21 | 15.122 | 0.526 | 0.2999 | 0.0074 | 2.73  | 0.07  | 0.066 | 0.002 | 0.74 |

---

**Table S3**

U–Pb isotope data of epidote unknowns. Uncertainties are given as 2 standard errors (2SE).  $f_{206}$  indicates the fraction of initial Pb in each measurement and it is calculated as:

$$\left( \left( {}^{207}\text{Pb}/{}^{206}\text{Pb} \right)_{\text{meas}} - \left( {}^{207}\text{Pb}/{}^{206}\text{Pb} \right)_{\text{rad}} \right) / \left( \left( {}^{207}\text{Pb}/{}^{206}\text{Pb} \right)_{\text{in}} - \left( {}^{207}\text{Pb}/{}^{206}\text{Pb} \right)_{\text{rad}} \right).$$

Error correlation (rho) is calculated as:

$$\left( \left( {}^{206}\text{Pb}/{}^{238}\text{U} \right) / 2SE_{206/238} \right) / \left( \left( \left( {}^{207}\text{Pb}/{}^{235}\text{U} \right) / 2SE_{207/235} \right) \right).$$

Initial  ${}^{207}\text{Pb}/{}^{206}\text{Pb}$  ratio are obtained from Tera – Wasserburg diagrams excluding outliers (see Sect. 5.1). in = initial; meas = measured; rad = radiogenic. Mass 235 is not measured, and therefore  ${}^{235}\text{U}$  is calculated from measurements of mass 238 using the  ${}^{238}\text{U}/{}^{235}\text{U}$  ratios of 137.818 according to Hiess et al. (2012).

| P6b  |           |                                      |       |                                       |        |                                      |       |                                      |        |      |                                                     |                                                      |
|------|-----------|--------------------------------------|-------|---------------------------------------|--------|--------------------------------------|-------|--------------------------------------|--------|------|-----------------------------------------------------|------------------------------------------------------|
| Spot | $f_{206}$ | ${}^{238}\text{U}/{}^{206}\text{Pb}$ | 2 SE  | ${}^{207}\text{Pb}/{}^{206}\text{Pb}$ | 2 SE   | ${}^{207}\text{Pb}/{}^{238}\text{U}$ | 2 SE  | ${}^{206}\text{Pb}/{}^{238}\text{U}$ | 2 SE   | rho  | $({}^{207}\text{Pb}/{}^{206}\text{Pb})_{\text{in}}$ | $({}^{207}\text{Pb}/{}^{206}\text{Pb})_{\text{rad}}$ |
| 1    | 1.00      | 1.240                                | 0.021 | 0.7837                                | 0.0039 | 87.27                                | 0.66  | 0.806                                | 0.014  | 0.44 | 0.7846                                              | 0.0466                                               |
| 2    | 0.99      | 1.082                                | 0.021 | 0.778                                 | 0.005  | 99.1                                 | 1.1   | 0.924                                | 0.018  | 0.57 |                                                     |                                                      |
| 3    | 0.99      | 2.411                                | 0.039 | 0.7744                                | 0.0049 | 44.39                                | 0.34  | 0.415                                | 0.007  | 0.47 |                                                     |                                                      |
| 4    | 0.94      | 14.577                               | 0.319 | 0.7439                                | 0.0062 | 7.1                                  | 0.1   | 0.069                                | 0.001  | 0.65 |                                                     |                                                      |
| 5    | 0.99      | 5.537                                | 0.095 | 0.7799                                | 0.0056 | 19.38                                | 0.18  | 0.181                                | 0.003  | 0.54 |                                                     |                                                      |
| 6    | 0.97      | 5.890                                | 0.090 | 0.7628                                | 0.0056 | 17.94                                | 0.11  | 0.170                                | 0.003  | 0.40 |                                                     |                                                      |
| 7    | 1.00      | 2.371                                | 0.047 | 0.785                                 | 0.005  | 45.91                                | 0.63  | 0.422                                | 0.008  | 0.69 |                                                     |                                                      |
| 8    | 0.91      | 22.311                               | 0.473 | 0.715                                 | 0.005  | 4.424                                | 0.076 | 0.045                                | 0.001  | 0.81 |                                                     |                                                      |
| 9    | 1.01      | 3.068                                | 0.050 | 0.793                                 | 0.004  | 35.68                                | 0.24  | 0.326                                | 0.005  | 0.41 |                                                     |                                                      |
| 10   | 0.96      | 8.241                                | 0.129 | 0.7553                                | 0.0048 | 12.662                               | 0.072 | 0.121                                | 0.002  | 0.36 |                                                     |                                                      |
| 11   | 0.99      | 2.239                                | 0.035 | 0.7769                                | 0.0051 | 47.88                                | 0.26  | 0.447                                | 0.007  | 0.35 |                                                     |                                                      |
| 12   | 0.99      | 7.032                                | 0.124 | 0.7802                                | 0.0071 | 15.42                                | 0.15  | 0.142                                | 0.002  | 0.55 |                                                     |                                                      |
| 13   | 0.97      | 7.197                                | 0.114 | 0.7591                                | 0.0049 | 14.567                               | 0.092 | 0.140                                | 0.002  | 0.40 |                                                     |                                                      |
| 14   | 0.97      | 3.044                                | 0.049 | 0.7618                                | 0.0061 | 34.55                                | 0.24  | 0.328                                | 0.005  | 0.43 |                                                     |                                                      |
| 15   | 0.99      | 3.578                                | 0.056 | 0.7792                                | 0.0063 | 30.25                                | 0.18  | 0.279                                | 0.004  | 0.38 |                                                     |                                                      |
| 16   | 0.99      | 2.447                                | 0.042 | 0.779                                 | 0.004  | 44.01                                | 0.49  | 0.409                                | 0.007  | 0.64 |                                                     |                                                      |
| 17   | 1.00      | 1.592                                | 0.028 | 0.7845                                | 0.0053 | 68.33                                | 0.73  | 0.628                                | 0.011  | 0.61 |                                                     |                                                      |
| 18   | 0.99      | 2.353                                | 0.039 | 0.7743                                | 0.0055 | 45.41                                | 0.44  | 0.425                                | 0.007  | 0.58 |                                                     |                                                      |
| 19   | 1.00      | 1.012                                | 0.017 | 0.786                                 | 0.003  | 107.27                               | 0.85  | 0.988                                | 0.017  | 0.46 |                                                     |                                                      |
| 20   | 0.99      | 0.184                                | 0.004 | 0.7805                                | 0.0036 | 585.5                                | 8.6   | 5.43                                 | 0.11   | 0.73 |                                                     |                                                      |
| 21   | 0.98      | 0.510                                | 0.009 | 0.7732                                | 0.0055 | 210.6                                | 1.9   | 1.962                                | 0.035  | 0.51 |                                                     |                                                      |
| 22   | 0.96      | 7.199                                | 0.420 | 0.7571                                | 0.0041 | 14.6                                 | 0.86  | 0.139                                | 0.0081 | 1.01 |                                                     |                                                      |
| 23   | 0.98      | 0.692                                | 0.011 | 0.7705                                | 0.0049 | 154.6                                | 1.2   | 1.445                                | 0.024  | 0.47 |                                                     |                                                      |
| 24   | 0.97      | 0.727                                | 0.012 | 0.7595                                | 0.0046 | 144.8                                | 1.1   | 1.376                                | 0.022  | 0.47 |                                                     |                                                      |
| 25   | 0.99      | 1.364                                | 0.035 | 0.776                                 | 0.006  | 78.6                                 | 1.8   | 0.733                                | 0.019  | 0.88 |                                                     |                                                      |

| P8   |      |                                     |       |                                      |        |                                     |      |                                     |       |      |                                                       |                                                        |
|------|------|-------------------------------------|-------|--------------------------------------|--------|-------------------------------------|------|-------------------------------------|-------|------|-------------------------------------------------------|--------------------------------------------------------|
| Spot | f206 | <sup>238</sup> U/ <sup>206</sup> Pb | 2 SE  | <sup>207</sup> Pb/ <sup>206</sup> Pb | 2 SE   | <sup>207</sup> Pb/ <sup>238</sup> U | 2 SE | <sup>206</sup> Pb/ <sup>238</sup> U | 2 SE  | rho  | ( <sup>207</sup> Pb/ <sup>206</sup> Pb) <sub>in</sub> | ( <sup>207</sup> Pb/ <sup>206</sup> Pb) <sub>rad</sub> |
| 1    | 0.99 | 0.646                               | 0.010 | 0.7717                               | 0.0052 | 164.3                               | 1.7  | 1.547                               | 0.025 | 0.64 | 0.7811                                                | 0.0466                                                 |
| 2    | 0.99 | 3.189                               | 0.065 | 0.7729                               | 0.0048 | 33.36                               | 0.58 | 0.314                               | 0.006 | 0.85 |                                                       |                                                        |
| 3    | 0.97 | 5.741                               | 0.089 | 0.7621                               | 0.0055 | 18.24                               | 0.12 | 0.174                               | 0.003 | 0.42 |                                                       |                                                        |
| 4    | 0.98 | 3.119                               | 0.051 | 0.7691                               | 0.0066 | 33.98                               | 0.33 | 0.321                               | 0.005 | 0.60 |                                                       |                                                        |
| 5    | 0.99 | 0.765                               | 0.014 | 0.7729                               | 0.0075 | 140.5                               | 1.6  | 1.307                               | 0.024 | 0.62 |                                                       |                                                        |
| 6    | 1.00 | 0.886                               | 0.016 | 0.7776                               | 0.0052 | 120.7                               | 1.1  | 1.13                                | 0.02  | 0.51 |                                                       |                                                        |
| 7    | 1.00 | 0.638                               | 0.013 | 0.7824                               | 0.0083 | 170.9                               | 2.3  | 1.568                               | 0.031 | 0.68 |                                                       |                                                        |
| 8    | 1.00 | 2.370                               | 0.067 | 0.7791                               | 0.0044 | 45.2                                | 1.1  | 0.422                               | 0.012 | 0.86 |                                                       |                                                        |
| 9    | 1.00 | 1.299                               | 0.027 | 0.7803                               | 0.0048 | 82.6                                | 1.1  | 0.77                                | 0.02  | 0.64 |                                                       |                                                        |
| 10   | 0.98 | 2.407                               | 0.050 | 0.769                                | 0.006  | 43.95                               | 0.78 | 0.415                               | 0.009 | 0.86 |                                                       |                                                        |
| 11   | 0.96 | 8.826                               | 0.179 | 0.7515                               | 0.0078 | 11.8                                | 0.2  | 0.113                               | 0.002 | 0.79 |                                                       |                                                        |
| 12   | 0.98 | 3.223                               | 0.049 | 0.7684                               | 0.0052 | 32.82                               | 0.25 | 0.310                               | 0.005 | 0.50 |                                                       |                                                        |
| 13   | 0.98 | 5.069                               | 0.077 | 0.7653                               | 0.0047 | 20.81                               | 0.11 | 0.197                               | 0.003 | 0.35 |                                                       |                                                        |
| 14   | 0.98 | 5.942                               | 0.099 | 0.7678                               | 0.0091 | 17.76                               | 0.17 | 0.168                               | 0.003 | 0.57 |                                                       |                                                        |
| 15   | 1.00 | 2.980                               | 0.052 | 0.7797                               | 0.0068 | 36.4                                | 0.4  | 0.336                               | 0.006 | 0.66 |                                                       |                                                        |
| 16   | 1.00 | 2.483                               | 0.056 | 0.7795                               | 0.0058 | 43.43                               | 0.82 | 0.403                               | 0.009 | 0.84 |                                                       |                                                        |
| 17   | 0.98 | 2.362                               | 0.051 | 0.7698                               | 0.0053 | 44.77                               | 0.61 | 0.423                               | 0.009 | 0.63 |                                                       |                                                        |
| 18   | 0.99 | 3.233                               | 0.050 | 0.7733                               | 0.0062 | 32.87                               | 0.25 | 0.309                               | 0.005 | 0.49 |                                                       |                                                        |
| 19   | 1.00 | 0.692                               | 0.013 | 0.7828                               | 0.0052 | 155.5                               | 1.7  | 1.446                               | 0.028 | 0.56 |                                                       |                                                        |
| 20   | 0.91 | 23.2126                             | 0.409 | 0.7137                               | 0.0065 | 4.26                                | 0.05 | 0.043                               | 0.001 | 0.69 |                                                       |                                                        |

| GE4  |      |                                     |       |                                      |        |                                     |       |                                     |       |      |                                                       |                                                        |
|------|------|-------------------------------------|-------|--------------------------------------|--------|-------------------------------------|-------|-------------------------------------|-------|------|-------------------------------------------------------|--------------------------------------------------------|
| Spot | f206 | <sup>238</sup> U/ <sup>206</sup> Pb | 2 SE  | <sup>207</sup> Pb/ <sup>206</sup> Pb | 2 SE   | <sup>207</sup> Pb/ <sup>238</sup> U | 2 SE  | <sup>206</sup> Pb/ <sup>238</sup> U | 2 SE  | rho  | ( <sup>207</sup> Pb/ <sup>206</sup> Pb) <sub>in</sub> | ( <sup>207</sup> Pb/ <sup>206</sup> Pb) <sub>rad</sub> |
| 1    | 1.02 | 1.733                               | 0.075 | 0.7476                               | 0.0085 | 59.9                                | 2.3   | 0.577                               | 0.025 | 0.89 | 0.7308                                                | 0.0464                                                 |
| 2    | 1.03 | 0.823                               | 0.024 | 0.752                                | 0.007  | 120.6                               | 1.6   | 1.208                               | 0.035 | 0.46 |                                                       |                                                        |
| 3    | 1.01 | 2.540                               | 0.071 | 0.74                                 | 0.01   | 40                                  | 0.81  | 0.394                               | 0.011 | 0.72 |                                                       |                                                        |
| 4    | 1.01 | 1.370                               | 0.045 | 0.7345                               | 0.0069 | 74.7                                | 2     | 0.73                                | 0.02  | 0.81 |                                                       |                                                        |
| 5    | 1.02 | 5.461                               | 0.146 | 0.742                                | 0.008  | 18.98                               | 0.2   | 0.183                               | 0.005 | 0.39 |                                                       |                                                        |
| 6    | 0.94 | 25.615                              | 0.656 | 0.6873                               | 0.0064 | 3.712                               | 0.046 | 0.039                               | 0.001 | 0.48 |                                                       |                                                        |
| 7    | 1.00 | 5.249                               | 0.234 | 0.728                                | 0.016  | 18.41                               | 0.79  | 0.190                               | 0.008 | 0.96 |                                                       |                                                        |
| 8    | 0.98 | 6.485                               | 0.206 | 0.719                                | 0.008  | 15.26                               | 0.3   | 0.154                               | 0.005 | 0.62 |                                                       |                                                        |
| 9    | 0.99 | 3.070                               | 0.085 | 0.7245                               | 0.0091 | 32.77                               | 0.41  | 0.326                               | 0.009 | 0.45 |                                                       |                                                        |
| 10   | 1.01 | 2.641                               | 0.077 | 0.74                                 | 0.01   | 37.93                               | 0.92  | 0.379                               | 0.011 | 0.83 |                                                       |                                                        |
| 11   | 0.96 | 7.605                               | 0.202 | 0.706                                | 0.008  | 13.05                               | 0.15  | 0.131                               | 0.003 | 0.43 |                                                       |                                                        |
| 12   | 0.98 | 6.702                               | 0.180 | 0.716                                | 0.008  | 14.93                               | 0.21  | 0.149                               | 0.004 | 0.52 |                                                       |                                                        |
| 13   | 0.98 | 9.930                               | 0.276 | 0.71                                 | 0.01   | 10.17                               | 0.19  | 0.101                               | 0.003 | 0.67 |                                                       |                                                        |
| 14   | 0.97 | 9.9108                              | 0.383 | 0.709                                | 0.013  | 10.06                               | 0.31  | 0.101                               | 0.004 | 0.80 |                                                       |                                                        |
| 15   | 0.97 | 9.766                               | 0.267 | 0.7072                               | 0.0074 | 10.22                               | 0.12  | 0.102                               | 0.003 | 0.43 |                                                       |                                                        |
| 16   | 0.97 | 3.698                               | 0.137 | 0.711                                | 0.012  | 26.72                               | 0.77  | 0.27                                | 0.01  | 0.78 |                                                       |                                                        |
| 17   | 0.95 | 10.699                              | 0.275 | 0.6984                               | 0.0064 | 9.11                                | 0.1   | 0.093                               | 0.002 | 0.43 |                                                       |                                                        |



|    |      |        |       |        |        |       |      |       |       |      |
|----|------|--------|-------|--------|--------|-------|------|-------|-------|------|
| 18 | 0.97 | 2.538  | 0.064 | 0.7103 | 0.0059 | 38.83 | 0.53 | 0.39  | 0.01  | 0.54 |
| 19 | 0.95 | 19.646 | 0.618 | 0.697  | 0.011  | 4.79  | 0.13 | 0.051 | 0.002 | 0.86 |
| 20 | 0.96 | 12.270 | 0.346 | 0.703  | 0.010  | 8.08  | 0.13 | 0.081 | 0.002 | 0.57 |
| 21 | 0.97 | 6.752  | 0.242 | 0.7136 | 0.0099 | 14.14 | 0.3  | 0.148 | 0.005 | 0.59 |
| 22 | 0.94 | 19.642 | 0.579 | 0.690  | 0.009  | 4.86  | 0.11 | 0.051 | 0.001 | 0.77 |
| 23 | 0.99 | 2.115  | 0.058 | 0.7255 | 0.0065 | 47.76 | 0.62 | 0.473 | 0.013 | 0.47 |
| 24 | 0.96 | 0.656  | 0.018 | 0.7008 | 0.0059 | 148.2 | 2.3  | 1.525 | 0.041 | 0.58 |

**OBA19-03B**

| Spot | f206 | <sup>238</sup> U/ <sup>206</sup> Pb | 2 SE      | <sup>207</sup> Pb/ <sup>206</sup> Pb | 2 SE   | <sup>207</sup> Pb/ <sup>235</sup> U | 2 SE | <sup>206</sup> Pb/ <sup>238</sup> U | 2 SE  | rho   | ( <sup>207</sup> Pb/ <sup>206</sup> Pb) <sub>in</sub> | ( <sup>207</sup> Pb/ <sup>206</sup> Pb) <sub>rad</sub> |
|------|------|-------------------------------------|-----------|--------------------------------------|--------|-------------------------------------|------|-------------------------------------|-------|-------|-------------------------------------------------------|--------------------------------------------------------|
| 1    | 0.99 | 5.822077317                         | 0.0881311 | 0.801                                | 0.004  | 19.16                               | 0.07 | 0.172                               | 0.003 | 0.25  | 0.8118                                                | 0.0463                                                 |
| 2    | 0.98 | 9.305                               | 0.1385    | 0.7975                               | 0.0032 | 11.79                               | 0.05 | 0.107                               | 0.002 | 0.315 |                                                       |                                                        |
| 3    | 0.97 | 13.4975                             | 0.219     | 0.7902                               | 0.0068 | 7.88                                | 0.05 | 0.075                               | 0.001 | 0.384 |                                                       |                                                        |
| 4    | 0.99 | 5.712                               | 0.085     | 0.8015                               | 0.0035 | 19.34                               | 0.09 | 0.175                               | 0.003 | 0.30  |                                                       |                                                        |
| 5    | 0.95 | 23.116                              | 0.353     | 0.7769                               | 0.0045 | 4.70                                | 0.02 | 0.043                               | 0.001 | 0.32  |                                                       |                                                        |
| 6    | 0.97 | 10.734                              | 0.161     | 0.7886                               | 0.0044 | 10.24                               | 0.05 | 0.093                               | 0.001 | 0.32  |                                                       |                                                        |
| 7    | 0.96 | 19.220                              | 0.307     | 0.7815                               | 0.0033 | 5.63                                | 0.03 | 0.052                               | 0.001 | 0.37  |                                                       |                                                        |
| 8    | 0.95 | 25.8937                             | 0.389     | 0.7723                               | 0.0035 | 4.11                                | 0.02 | 0.039                               | 0.001 | 0.28  |                                                       |                                                        |
| 9    | 1.00 | 4.320                               | 0.065     | 0.8085                               | 0.0031 | 25.78                               | 0.11 | 0.231                               | 0.003 | 0.28  |                                                       |                                                        |
| 10   | 0.97 | 17.437                              | 0.277     | 0.7904                               | 0.0036 | 6.31                                | 0.04 | 0.057                               | 0.001 | 0.43  |                                                       |                                                        |
| 11   | 0.97 | 12.293                              | 0.181     | 0.7919                               | 0.0032 | 8.87                                | 0.04 | 0.081                               | 0.001 | 0.34  |                                                       |                                                        |
| 12   | 0.98 | 9.359                               | 0.140     | 0.7978                               | 0.0039 | 11.57                               | 0.09 | 0.107                               | 0.002 | 0.54  |                                                       |                                                        |
| 13   | 0.98 | 7.771                               | 0.115     | 0.7986                               | 0.0036 | 14.15                               | 0.06 | 0.129                               | 0.002 | 0.29  |                                                       |                                                        |
| 14   | 0.98 | 8.331                               | 0.125     | 0.7988                               | 0.0034 | 13.19                               | 0.11 | 0.120                               | 0.002 | 0.56  |                                                       |                                                        |
| 15   | 0.98 | 10.801                              | 0.163     | 0.7932                               | 0.0044 | 10.23                               | 0.05 | 0.093                               | 0.001 | 0.31  |                                                       |                                                        |
| 16   | 0.98 | 6.848                               | 0.098     | 0.7988                               | 0.0025 | 16.07                               | 0.07 | 0.146                               | 0.002 | 0.32  |                                                       |                                                        |
| 17   | 1.01 | 0.361                               | 0.006     | 0.8165                               | 0.0042 | 297.3                               | 3.9  | 2.77                                | 0.049 | 0.74  |                                                       |                                                        |
| 18   | 0.99 | 5.023                               | 0.076     | 0.8055                               | 0.0039 | 22.02                               | 0.13 | 0.199                               | 0.003 | 0.39  |                                                       |                                                        |
| 19   | 0.99 | 7.677                               | 0.118     | 0.8013                               | 0.0044 | 14.52                               | 0.07 | 0.130                               | 0.002 | 0.33  |                                                       |                                                        |

**GAS19-01A**

| Spot | f206 | <sup>238</sup> U/ <sup>206</sup> Pb | 2 SE  | <sup>207</sup> Pb/ <sup>206</sup> Pb | 2 SE   | <sup>207</sup> Pb/ <sup>235</sup> U | 2 SE | <sup>206</sup> Pb/ <sup>238</sup> U | 2 SE  | rho  | ( <sup>207</sup> Pb/ <sup>206</sup> Pb) <sub>in</sub> | ( <sup>207</sup> Pb/ <sup>206</sup> Pb) <sub>rad</sub> |
|------|------|-------------------------------------|-------|--------------------------------------|--------|-------------------------------------|------|-------------------------------------|-------|------|-------------------------------------------------------|--------------------------------------------------------|
| 1    | 0.99 | 6.835                               | 0.107 | 0.8306                               | 0.0071 | 16.78                               | 0.15 | 0.146                               | 0.002 | 0.57 | 0.8381                                                | 0.0463                                                 |
| 2    | 1.00 | 1.797                               | 0.035 | 0.841                                | 0.006  | 64.41                               | 0.93 | 0.556                               | 0.011 | 0.73 |                                                       |                                                        |
| 3    | 1.00 | 2.823                               | 0.076 | 0.8358                               | 0.0058 | 41                                  | 1    | 0.354                               | 0.009 | 0.91 |                                                       |                                                        |
| 4    | 1.01 | 1.108                               | 0.018 | 0.8427                               | 0.0072 | 104                                 | 1    | 0.903                               | 0.015 | 0.58 |                                                       |                                                        |
| 5    | 1.00 | 1.938                               | 0.032 | 0.8362                               | 0.0065 | 59.3                                | 0.4  | 0.516                               | 0.008 | 0.41 |                                                       |                                                        |
| 6    | 1.00 | 0.022                               | 0.001 | 0.8391                               | 0.0038 | 5340                                | 120  | 45.9                                | 1.2   | 0.86 |                                                       |                                                        |
| 7    | 1.00 | 0.845                               | 0.015 | 0.8403                               | 0.0072 | 134.3                               | 1.6  | 1.183                               | 0.021 | 0.67 |                                                       |                                                        |
| 8    | 1.00 | 1.214                               | 0.022 | 0.84                                 | 0.01   | 96.5                                | 1.2  | 0.824                               | 0.015 | 0.68 |                                                       |                                                        |
| 9    | 1.01 | 1.253                               | 0.025 | 0.8437                               | 0.0071 | 93.8                                | 1.4  | 0.798                               | 0.016 | 0.74 |                                                       |                                                        |
| 10   | 1.00 | 1.536                               | 0.026 | 0.8349                               | 0.0055 | 74.7                                | 0.5  | 0.651                               | 0.011 | 0.40 |                                                       |                                                        |
| 11   | 0.99 | 3.733                               | 0.067 | 0.8339                               | 0.0071 | 30.71                               | 0.39 | 0.268                               | 0.005 | 0.71 |                                                       |                                                        |

|    |      |       |       |        |        |        |      |       |       |      |
|----|------|-------|-------|--------|--------|--------|------|-------|-------|------|
| 12 | 1.00 | 1.570 | 0.024 | 0.837  | 0.003  | 73.35  | 0.49 | 0.637 | 0.010 | 0.44 |
| 13 | 0.99 | 1.785 | 0.028 | 0.8338 | 0.0041 | 64.4   | 0.5  | 0.560 | 0.009 | 0.50 |
| 14 | 1.00 | 0.469 | 0.007 | 0.8373 | 0.0039 | 245.4  | 1.9  | 2.132 | 0.034 | 0.49 |
| 15 | 1.00 | 0.928 | 0.015 | 0.834  | 0.004  | 123.47 | 0.73 | 1.077 | 0.017 | 0.37 |
| 16 | 1.00 | 1.805 | 0.029 | 0.835  | 0.003  | 63.75  | 0.59 | 0.554 | 0.009 | 0.57 |
| 17 | 0.99 | 3.273 | 0.049 | 0.8289 | 0.0038 | 35.22  | 0.19 | 0.305 | 0.005 | 0.36 |
| 18 | 0.99 | 1.615 | 0.039 | 0.8305 | 0.0049 | 71     | 1    | 0.619 | 0.015 | 0.87 |
| 19 | 1.00 | 1.404 | 0.039 | 0.836  | 0.006  | 83     | 2    | 0.71  | 0.02  | 0.86 |
| 20 | 0.99 | 2.494 | 0.039 | 0.8287 | 0.0068 | 45.71  | 0.29 | 0.401 | 0.006 | 0.40 |
| 21 | 0.99 | 2.100 | 0.034 | 0.832  | 0.006  | 54.5   | 0.5  | 0.476 | 0.008 | 0.58 |
| 22 | 1.00 | 0.623 | 0.010 | 0.8344 | 0.0044 | 184.5  | 1.7  | 1.606 | 0.025 | 0.59 |
| 23 | 1.00 | 2.337 | 0.047 | 0.8343 | 0.0046 | 49.1   | 0.6  | 0.428 | 0.009 | 0.57 |
| 24 | 1.00 | 1.485 | 0.026 | 0.8399 | 0.0064 | 77.8   | 1.1  | 0.673 | 0.012 | 0.79 |
| 25 | 1.00 | 1.896 | 0.031 | 0.8343 | 0.0066 | 60.48  | 0.39 | 0.527 | 0.008 | 0.40 |
| 26 | 1.00 | 0.739 | 0.011 | 0.8381 | 0.0046 | 155.9  | 1.1  | 1.353 | 0.021 | 0.45 |
| 27 | 0.99 | 1.261 | 0.024 | 0.8335 | 0.0053 | 90.92  | 0.94 | 0.793 | 0.015 | 0.55 |
| 28 | 0.99 | 1.511 | 0.023 | 0.831  | 0.005  | 75.69  | 0.48 | 0.66  | 0.01  | 0.42 |

**Planggenstock**

| Spot | f206 | <sup>238</sup> U/ <sup>206</sup> Pb | 2 SE  | <sup>207</sup> Pb/ <sup>206</sup> Pb | 2 SE   | <sup>207</sup> Pb/ <sup>235</sup> U | 2 SE | <sup>206</sup> Pb/ <sup>238</sup> U | 2 SE  | rho  | ( <sup>207</sup> Pb/ <sup>206</sup> Pb) <sub>in</sub> | ( <sup>207</sup> Pb/ <sup>206</sup> Pb) <sub>rad</sub> |
|------|------|-------------------------------------|-------|--------------------------------------|--------|-------------------------------------|------|-------------------------------------|-------|------|-------------------------------------------------------|--------------------------------------------------------|
| 1    | 0.99 | 2.488                               | 0.099 | 0.8017                               | 0.0077 | 45                                  | 1    | 0.402                               | 0.016 | 0.56 | 0.8071                                                | 0.0463                                                 |
| 2    | 1.00 | 0.945                               | 0.032 | 0.8089                               | 0.0045 | 118.6                               | 1.2  | 1.058                               | 0.036 | 0.30 |                                                       |                                                        |
| 3    | 0.99 | 2.964                               | 0.105 | 0.8025                               | 0.0045 | 37.49                               | 0.37 | 0.337                               | 0.012 | 0.28 |                                                       |                                                        |
| 4    | 1.00 | 1.618                               | 0.055 | 0.8056                               | 0.0045 | 68.9                                | 0.9  | 0.618                               | 0.021 | 0.38 |                                                       |                                                        |
| 5    | 0.98 | 9.385                               | 0.317 | 0.7924                               | 0.0048 | 11.68                               | 0.08 | 0.106                               | 0.004 | 0.19 |                                                       |                                                        |
| 6    | 1.00 | 1.010                               | 0.035 | 0.807                                | 0.005  | 110.6                               | 1.3  | 0.99                                | 0.03  | 0.34 |                                                       |                                                        |
| 7    | 1.01 | 1.316                               | 0.045 | 0.8126                               | 0.0061 | 84.88                               | 0.86 | 0.760                               | 0.026 | 0.30 |                                                       |                                                        |
| 8    | 1.00 | 1.831                               | 0.060 | 0.8063                               | 0.0044 | 61                                  | +    | 0.546                               | 0.018 | 0.23 |                                                       |                                                        |
| 9    | 1.00 | 1.431                               | 0.049 | 0.8062                               | 0.0043 | 78.02                               | 0.88 | 0.699                               | 0.024 | 0.33 |                                                       |                                                        |
| 10   | 0.99 | 3.275                               | 0.107 | 0.802                                | 0.004  | 33.92                               | 0.26 | 0.30                                | 0.01  | 0.23 |                                                       |                                                        |
| 11   | 0.99 | 3.116                               | 0.107 | 0.799                                | 0.004  | 35.56                               | 0.37 | 0.321                               | 0.011 | 0.30 |                                                       |                                                        |
| 12   | 0.99 | 1.434                               | 0.049 | 0.8016                               | 0.0044 | 77.4                                | 0.8  | 0.697                               | 0.024 | 0.29 |                                                       |                                                        |
| 13   | 0.99 | 2.950                               | 0.096 | 0.7995                               | 0.0046 | 37.52                               | 0.26 | 0.339                               | 0.011 | 0.21 |                                                       |                                                        |
| 14   | 0.98 | 3.774                               | 0.127 | 0.794                                | 0.005  | 29.12                               | 0.16 | 0.265                               | 0.009 | 0.16 |                                                       |                                                        |
| 15   | 0.99 | 3.532                               | 0.120 | 0.799                                | 0.005  | 31.41                               | 0.27 | 0.283                               | 0.010 | 0.25 |                                                       |                                                        |
| 16   | 1.00 | 3.382                               | 0.114 | 0.804                                | 0.005  | 33                                  | +    | 0.30                                | 0.01  | 0.30 |                                                       |                                                        |
| 17   | 1.00 | 2.623                               | 0.089 | 0.8061                               | 0.0062 | 42.32                               | 0.56 | 0.381                               | 0.013 | 0.39 |                                                       |                                                        |
| 18   | 0.99 | 3.940                               | 0.132 | 0.801                                | 0.004  | 28.12                               | 0.12 | 0.254                               | 0.008 | 0.13 |                                                       |                                                        |
| 19   | 0.99 | 2.089                               | 0.070 | 0.8018                               | 0.0044 | 53.17                               | 0.23 | 0.479                               | 0.016 | 0.13 |                                                       |                                                        |
| 20   | 1.00 | 1.635                               | 0.056 | 0.8038                               | 0.0044 | 68.08                               | 0.66 | 0.612                               | 0.021 | 0.28 |                                                       |                                                        |
| 21   | 0.84 | 83.822                              | 3.091 | 0.683                                | 0.017  | 1.14                                | 0.02 | 0.012                               | 0.001 | 0.48 |                                                       |                                                        |
| 22   | 0.99 | 8.171                               | 0.274 | 0.8011                               | 0.0081 | 13.58                               | 0.12 | 0.122                               | 0.004 | 0.26 |                                                       |                                                        |

|    |      |       |       |        |        |       |      |       |       |      |
|----|------|-------|-------|--------|--------|-------|------|-------|-------|------|
| 23 | 0.99 | 6.588 | 0.239 | 0.797  | 0.013  | 16.93 | 0.26 | 0.152 | 0.005 | 0.42 |
| 24 | 1.01 | 3.2   | 0.1   | 0.8131 | 0.0096 | 35.1  | 0.4  | 0.312 | 0.011 | 0.29 |
| 25 | 0.99 | 1.659 | 0.055 | 0.8024 | 0.0048 | 66.98 | 0.38 | 0.60  | 0.02  | 0.17 |
| 26 | 1.00 | 2.226 | 0.074 | 0.8088 | 0.0065 | 50.4  | 0.4  | 0.449 | 0.015 | 0.24 |
| 27 | 0.99 | 2.011 | 0.069 | 0.8003 | 0.0075 | 55.09 | 0.44 | 0.497 | 0.017 | 0.23 |
| 28 | 0.99 | 3.418 | 0.114 | 0.8007 | 0.0052 | 32.43 | 0.18 | 0.293 | 0.010 | 0.17 |
| 29 | 1.00 | 1.636 | 0.056 | 0.804  | 0.005  | 68.09 | 0.39 | 0.611 | 0.021 | 0.17 |
| 30 | 1.00 | 1.780 | 0.060 | 0.8064 | 0.0048 | 62.81 | 0.34 | 0.562 | 0.019 | 0.16 |
| 31 | 0.98 | 9.288 | 0.311 | 0.793  | 0.005  | 11.83 | 0.07 | 0.108 | 0.004 | 0.17 |
| 32 | 0.99 | 5.653 | 0.195 | 0.801  | 0.005  | 19.58 | 0.22 | 0.177 | 0.006 | 0.33 |
| 33 | 0.99 | 6.743 | 0.227 | 0.7968 | 0.0049 | 16.37 | 0.08 | 0.148 | 0.005 | 0.14 |
| 34 | 1.00 | 4.843 | 0.171 | 0.8065 | 0.0063 | 23.06 | 0.27 | 0.206 | 0.007 | 0.33 |
| 35 | 0.98 | 9.952 | 0.337 | 0.7953 | 0.0051 | 11.09 | 0.07 | 0.100 | 0.003 | 0.18 |
| 36 | 1.00 | 1.333 | 0.044 | 0.8047 | 0.0045 | 83.47 | 0.46 | 0.75  | 0.02  | 0.16 |

---

### **3 Cerium, Pb, Th, U and sum of REE ( $\Sigma$ REE) of the studied epidote samples**

Mass fractions of Ce, Pb, Th, U and the sum of REE ( $\Sigma$ REE; Table S4) were determined by LA-ICP-MS at the University of Bern. Measurements in samples P1 of spots 13–38 were carried out on a Geolas Pro 193 nm ArF excimer laser (Coherent, USA) coupled with an ELAN DRCE quadrupole ICP-MS (QMS; Perkin Elmer, USA). Ablation rate was ca. 0.1  $\mu\text{m}$  per laser pulse, repetition rate 10 Hz and beam sizes between 24 and 60  $\mu\text{m}$ , with ablation in 1 L  $\text{min}^{-1}$  He and 0.008 L  $\text{min}^{-1}$  H<sub>2</sub>. Details on the measurement procedures are outlined in Pettke et al. (2012). All other samples and spots in sample P1 were analyzed on a RESOLUTIONSE 193 nm excimer laser system (Applied Spectra, USA) equipped with an S-155 large-volume constant-geometry chamber (Laurin Technic, Australia) coupled with an Agilent 7900 ICP-QMS. Repetition rate was 5 Hz, spot sizes between 20 and 30  $\mu\text{m}$ , with ablation in He which admixed with the Ar carrier gas for transport to the ICP-MS. The NIST SRM612 was used for optimization of analytical conditions of both systems. The basalt glass GSD-1G was used as external standard, and the NIST SRM612 for quality control. Data reduction was carried out using SILLS (Guillong et al., 2008), using the sum of total oxides (98.3 % for epidote and 100 % for the NIST SRM612) for internal standardization (see Halter et al., 2002). Calculation of limits of detection used the formulation of Pettke et al. (2012) for each element in each analysis.

**Table S4: Cerium, Th, U and sum of REE ( $\Sigma$ REE) measured by LA-ICP-MS in the studied epidote samples. Analyses below limits of detection are indicated by the symbol < followed by limit of detection calculated for that specific analysis. N/A = all REE measurements were below individual limits of detection.**

| Analysis          | Ce [ $\mu\text{g g}^{-1}$ ] | Pb [ $\mu\text{g g}^{-1}$ ] | Th [ $\mu\text{g g}^{-1}$ ] | U [ $\mu\text{g g}^{-1}$ ] | $\Sigma$ REE [ $\mu\text{g g}^{-1}$ ] |
|-------------------|-----------------------------|-----------------------------|-----------------------------|----------------------------|---------------------------------------|
| <b>Epidote P1</b> |                             |                             |                             |                            |                                       |
| 1                 | 0.03                        | 19                          | 0.004                       | 4.9                        | 0.84                                  |
| 2                 | 2.1                         | 44                          | 0.75                        | 6.3                        | 9.4                                   |
| 3                 | 0.22                        | 26                          | 0.003                       | 4.8                        | 1.9                                   |
| 4                 | 0.02                        | 28                          | 0.88                        | 3.3                        | 0.04                                  |
| 5                 | 0.02                        | 12                          | < 0.01                      | 0.28                       | 0.20                                  |
| 6                 | 1.2                         | 24                          | < 0.02                      | 2.0                        | 3.3                                   |
| 7                 | 0.11                        | 7.3                         | < 0.01                      | 2.7                        | 2.0                                   |
| 8                 | 0.14                        | 12                          | < 0.01                      | 1.2                        | 1.7                                   |
| 9                 | 0.69                        | 12                          | < 0.01                      | 1.2                        | 3.4                                   |
| 10                | 1.2                         | 13                          | < 0.01                      | 1.2                        | 4.9                                   |
| 11                | 0.55                        | 17                          | < 0.01                      | 1.4                        | 2.7                                   |
| 12                | 1.6                         | 91                          | 0.11                        | 0.88                       | 7.9                                   |
| 13                | 1.2                         | 23                          | 0.23                        | 2.8                        | 19                                    |
| 14                | 1.0                         | 32                          | 0.10                        | 4.8                        | 12                                    |
| 15                | 2.9                         | 26                          | 0.24                        | 0.69                       | 11                                    |
| 16                | 1.6                         | 13                          | 0.08                        | 1.8                        | 10                                    |
| 17                | < 0.10                      | 28                          | < 0.04                      | 0.24                       | N/A                                   |
| 18                | 0.20                        | 12                          | 0.01                        | 0.92                       | 1.9                                   |
| 19                | 0.47                        | 23                          | 0.06                        | 2.4                        | 5.2                                   |
| 20                | 0.71                        | 35                          | < 0.07                      | 5.0                        | 7.0                                   |
| 21                | 0.04                        | 7.6                         | < 0.03                      | 0.53                       | 0.04                                  |
| 22                | < 0.07                      | 15                          | < 0.02                      | 0.87                       | 0.11                                  |
| 23                | 4.2                         | 28                          | < 0.02                      | 0.51                       | 8.3                                   |
| 24                | < 0.09                      | 27                          | < 0.03                      | 0.49                       | N/A                                   |
| 25                | 8.3                         | 9.5                         | < 0.03                      | 1.2                        | 24                                    |

|    |      |     |        |      |      |
|----|------|-----|--------|------|------|
| 26 | 0.78 | 7.5 | 0.04   | 0.85 | 3.7  |
| 27 | 0.30 | 16  | 0.02   | 1.2  | 3.0  |
| 28 | 0.26 | 8.6 | < 0.02 | 1.7  | 2.4  |
| 29 | 0.70 | 11  | < 0.01 | 2.2  | 3.4  |
| 30 | 0.29 | 11  | 0.08   | 0.52 | 0.89 |
| 31 | 0.12 | 24  | 0.06   | 6.0  | 1.5  |
| 32 | 1.1  | 16  | < 0.07 | 14   | 23   |
| 33 | 0.17 | 6.3 | < 0.03 | 1.5  | 0.83 |
| 34 | 0.56 | 67  | 0.02   | 7.4  | 2.0  |
| 35 | 0.12 | 58  | 0.03   | 11   | 1.4  |
| 36 | 0.20 | 12  | < 0.01 | 1.6  | 2.3  |
| 37 | 0.21 | 13  | < 0.01 | 0.95 | 2.4  |
| 38 | 0.16 | 10  | < 0.02 | 1.4  | 1.7  |

---

**Epidote P2**

---

|   |      |     |        |      |      |
|---|------|-----|--------|------|------|
| 1 | 0.71 | 6.3 | < 0.06 | 2.1  | 1.9  |
| 2 | 0.13 | 11  | < 0.06 | 1.4  | 0.24 |
| 2 | 34   | 42  | < 0.08 | 2.3  | 79   |
| 3 | 18   | 39  | < 0.05 | 1.4  | 39   |
| 3 | 1.1  | 33  | < 0.06 | 0.78 | 3.6  |
| 4 | 0.92 | 12  | < 0.11 | 0.49 | 2.2  |
| 4 | 0.77 | 29  | 9.8    | 2.1  | 2.6  |
| 5 | 0.26 | 48  | < 0.07 | 0.63 | 1.8  |
| 5 | 7.8  | 36  | 3.4    | 8.2  | 27   |
| 6 | 0.51 | 15  | < 0.04 | 1.0  | 3.1  |
| 6 | 0.42 | 18  | < 0.05 | 1.2  | 2.8  |
| 7 | 1.3  | 20  | < 0.03 | 0.99 | 5.0  |
| 7 | 0.42 | 18  | < 0.05 | 0.78 | 2.4  |
| 8 | 1.3  | 27  | < 0.04 | 1.8  | 6.7  |
| 8 | 15   | 17  | < 0.03 | 2.7  | 38   |
| 9 | 0.49 | 25  | 0.04   | 1.1  | 2.6  |
| 9 | 5.9  | 24  | 0.52   | 15   | 21   |

|    |      |     |        |      |      |
|----|------|-----|--------|------|------|
| 10 | 1.6  | 44  | 0.36   | 2.6  | 5.1  |
| 10 | 0.03 | 20  | 4.5    | 0.72 | 0.14 |
| 11 | 0.20 | 47  | < 0.03 | 0.45 | 1.6  |
| 11 | 0.11 | 47  | < 0.04 | 0.69 | 0.92 |
| 12 | 0.88 | 50  | < 0.02 | 1.5  | 3.2  |
| 12 | 0.05 | 21  | 0.39   | 2.6  | 0.50 |
| 13 | 5.3  | 121 | < 0.02 | 18   | 14   |
| 13 | 0.10 | 11  | < 0.02 | 0.69 | 0.25 |
| 14 | 0.32 | 23  | < 0.01 | 6.1  | 1.2  |

---

**Epidote P3**

---

|   |     |    |        |     |     |
|---|-----|----|--------|-----|-----|
| 1 | 200 | 54 | 1.8    | 6.5 | 469 |
| 2 | 50  | 34 | 2.3    | 6.7 | 128 |
| 2 | 132 | 40 | 1.3    | 14  | 313 |
| 3 | 1.9 | 60 | 20     | 2.0 | 8.6 |
| 3 | 5.8 | 56 | < 0.04 | 1.1 | 17  |

---

**Epidote Grimsel-1**

---

|   |     |     |        |     |     |
|---|-----|-----|--------|-----|-----|
| 1 | 10  | 172 | 8.9    | 133 | 92  |
| 2 | 8.1 | 150 | 0.18   | 137 | 96  |
| 2 | 4.1 | 125 | 0.15   | 188 | 48  |
| 3 | 7.6 | 135 | 0.30   | 186 | 69  |
| 3 | 7.4 | 133 | 0.26   | 174 | 70  |
| 4 | 4.3 | 118 | 0.14   | 164 | 48  |
| 4 | 6.6 | 130 | 0.36   | 160 | 54  |
| 5 | 7.6 | 136 | 2.2    | 185 | 64  |
| 5 | 8.2 | 132 | 2.0    | 192 | 63  |
| 6 | 5.2 | 133 | 0.12   | 195 | 57  |
| 6 | 8.5 | 151 | 7.6    | 182 | 67  |
| 7 | 20  | 152 | 0.99   | 226 | 125 |
| 7 | 14  | 127 | 0.47   | 79  | 131 |
| 8 | 18  | 131 | < 0.09 | 129 | 163 |
| 8 | 8.8 | 155 | 0.82   | 353 | 89  |

|    |      |     |      |     |     |
|----|------|-----|------|-----|-----|
| 9  | 1.9  | 171 | 0.15 | 266 | 67  |
| 9  | 9.3  | 97  | 0.07 | 60  | 42  |
| 10 | 15   | 169 | 0.71 | 125 | 87  |
| 10 | 9.3  | 87  | 0.30 | 137 | 55  |
| 11 | 17   | 174 | 0.56 | 242 | 131 |
| 11 | 12   | 148 | 2.6  | 102 | 79  |
| 12 | 9.7  | 175 | 0.47 | 225 | 82  |
| 12 | 7.2  | 93  | 4.9  | 103 | 34  |
| 13 | 8.5  | 193 | 0.81 | 136 | 53  |
| 13 | 3.0  | 78  | 1.9  | 158 | 40  |
| 14 | 2.5  | 179 | 0.14 | 263 | 79  |
| 14 | 0.97 | 93  | 0.04 | 54  | 23  |
| 15 | 3.0  | 152 | 0.84 | 140 | 48  |
| 15 | 6.3  | 93  | 0.83 | 118 | 41  |
| 16 | 2.9  | 113 | 3.0  | 105 | 30  |

**Epidote Grimsel-2**

|    |     |    |        |     |     |
|----|-----|----|--------|-----|-----|
| 1  | 10  | 75 | 0.07   | 217 | 144 |
| 2  | 6.8 | 69 | 0.27   | 159 | 110 |
| 3  | 7.1 | 75 | 0.20   | 151 | 100 |
| 4  | 5.2 | 51 | < 0.06 | 121 | 100 |
| 5  | 4.4 | 62 | < 0.05 | 117 | 87  |
| 6  | 6.8 | 74 | 0.07   | 161 | 97  |
| 7  | 14  | 97 | 0.11   | 273 | 180 |
| 8  | 18  | 95 | 0.13   | 266 | 125 |
| 9  | 17  | 65 | 0.21   | 284 | 115 |
| 10 | 6.1 | 88 | < 0.02 | 177 | 131 |
| 11 | 9.5 | 93 | < 0.03 | 109 | 117 |
| 12 | 29  | 75 | 0.53   | 535 | 188 |
| 13 | 10  | 62 | 0.36   | 311 | 97  |

**Epidote P6b**

|   |     |    |        |     |    |
|---|-----|----|--------|-----|----|
| 1 | 2.1 | 39 | < 0.04 | 180 | 71 |
|---|-----|----|--------|-----|----|



|    |      |     |        |     |     |
|----|------|-----|--------|-----|-----|
| 2  | 1.7  | 109 | < 0.03 | 29  | 30  |
| 3  | 1.6  | 75  | < 0.04 | 11  | 24  |
| 4  | 6.1  | 56  | 0.25   | 43  | 37  |
| 5  | 4.6  | 51  | 0.60   | 40  | 30  |
| 6  | 0.69 | 33  | < 0.04 | 42  | 13  |
| 7  | 1.6  | 34  | < 0.04 | 174 | 40  |
| 8  | 3.6  | 32  | 0.04   | 12  | 23  |
| 9  | 0.99 | 41  | < 0.01 | 40  | 15  |
| 10 | 9.3  | 115 | 0.02   | 24  | 46  |
| 11 | 11   | 54  | < 0.06 | 5.2 | 40  |
| 12 | 2.3  | 79  | < 0.02 | 8.1 | 14  |
| 13 | 6.4  | 84  | < 0.07 | 8.3 | 28  |
| 14 | 0.89 | 60  | < 0.04 | 4.0 | 12  |
| 15 | 2.5  | 98  | < 0.01 | 18  | 28  |
| 16 | 0.70 | 67  | < 0.04 | 5.6 | 13  |
| 17 | 2.8  | 176 | < 0.06 | 7.7 | 27  |
| 18 | 19   | 46  | 0.08   | 17  | 68  |
| 19 | 34   | 119 | 0.52   | 40  | 109 |
| 20 | 6.2  | 59  | < 0.05 | 9.1 | 40  |

**Epidote P8**

|    |      |    |        |     |    |
|----|------|----|--------|-----|----|
| 1  | 0.78 | 26 | < 0.04 | 30  | 25 |
| 2  | 3.5  | 53 | 0.22   | 201 | 62 |
| 3  | 4.7  | 35 | 0.08   | 67  | 49 |
| 4  | 1.5  | 58 | 0.01   | 24  | 22 |
| 5  | 1.2  | 26 | < 0.03 | 15  | 15 |
| 6  | 2.4  | 58 | < 0.03 | 79  | 54 |
| 7  | 2.9  | 68 | 0.05   | 11  | 28 |
| 8  | 0.89 | 56 | < 0.02 | 27  | 20 |
| 9  | 6.9  | 52 | < 0.04 | 7.1 | 37 |
| 10 | 1.2  | 45 | < 0.01 | 71  | 37 |
| 11 | 0.72 | 34 | < 0.02 | 57  | 33 |

|    |      |    |        |    |    |
|----|------|----|--------|----|----|
| 12 | 0.94 | 48 | < 0.02 | 18 | 19 |
| 13 | 0.94 | 30 | 0.06   | 24 | 18 |

---

**Epidote GE4**

---

|    |      |    |         |     |     |
|----|------|----|---------|-----|-----|
| 1  | 28   | 38 | 0.004   | 80  | 196 |
| 2  | 2.1  | 30 | < 0.006 | 20  | 42  |
| 3  | 0.55 | 30 | < 0.008 | 11  | 21  |
| 4  | 0.84 | 31 | < 0.007 | 41  | 59  |
| 5  | 3.1  | 61 | 0.02    | 162 | 132 |
| 6  | 0.38 | 58 | 0.01    | 5.4 | 13  |
| 7  | 84   | 63 | 1.3     | 147 | 441 |
| 8  | 1.7  | 43 | 0.07    | 160 | 99  |
| 9  | 2.1  | 63 | 0.06    | 76  | 156 |
| 10 | 2.0  | 77 | 0.01    | 53  | 107 |
| 11 | 2.1  | 29 | < 0.005 | 72  | 116 |
| 12 | 1.2  | 62 | 0.03    | 48  | 77  |
| 13 | 5.6  | 43 | 0.56    | 20  | 80  |
| 14 | 0.11 | 18 | 0.00    | 15  | 214 |
| 15 | 1.3  | 47 | 0.11    | 182 | 142 |
| 16 | 1.3  | 66 | 0.01    | 107 | 168 |

---

**Epidote OBA19-03B**

---

|    |      |     |         |     |      |
|----|------|-----|---------|-----|------|
| 1  | 1.7  | 189 | < 0.01  | 363 | 160  |
| 2  | 6.4  | 128 | 0.01    | 263 | 282  |
| 3  | 8.8  | 200 | < 0.007 | 475 | 366  |
| 4  | 3.8  | 168 | < 0.01  | 531 | 348  |
| 5  | 365  | 127 | 7.9     | 365 | 1437 |
| 6  | 81   | 114 | 1.7     | 604 | 636  |
| 7  | 1.3  | 175 | < 0.007 | 415 | 265  |
| 8  | 6.2  | 151 | 0.02    | 439 | 328  |
| 9  | 321  | 151 | 13      | 452 | 1364 |
| 10 | 0.26 | 116 | 0.04    | 313 | 50   |
| 11 | 1.0  | 148 | 0.04    | 124 | 24   |

|    |      |     |                   |     |      |
|----|------|-----|-------------------|-----|------|
| 12 | 331  | 118 | 1.5               | 330 | 1293 |
| 13 | 0.26 | 117 | 0.02              | 245 | 95   |
| 14 | 0.20 | 120 | 0.02              | 158 | 51   |
| 15 | 0.25 | 134 | 0.03              | 101 | 29   |
| 16 | 240  | 164 | 12                | 191 | 893  |
| 17 | 422  | 166 | 2.9               | 345 | 1499 |
| 18 | 25   | 146 | 0.43              | 224 | 250  |
| 19 | 15   | 197 | 0.01              | 456 | 395  |
| 20 | 17   | 186 | 0.13              | 466 | 431  |
| 21 | 0.19 | 137 | <i>&lt; 0.007</i> | 342 | 165  |
| 22 | 3.6  | 116 | <i>&lt; 0.01</i>  | 249 | 247  |
| 23 | 0.08 | 142 | <i>&lt; 0.01</i>  | 247 | 87   |
| 24 | 6.2  | 115 | <i>0.02</i>       | 246 | 209  |
| 25 | 0.02 | 116 | <i>&lt; 0.005</i> | 241 | 149  |
| 26 | 0.04 | 191 | <i>&lt; 0.01</i>  | 221 | 75   |

**Epidote GAS19-01A**

|    |      |     |                  |     |     |
|----|------|-----|------------------|-----|-----|
| 1  | 1.1  | 37  | 0.12             | 56  | 21  |
| 2  | 0.97 | 39  | 0.09             | 22  | 13  |
| 3  | 1.0  | 48  | 2.5              | 27  | 14  |
| 4  | 0.46 | 67  | 0.13             | 13  | 6.6 |
| 5  | 0.90 | 45  | <i>&lt; 0.01</i> | 18  | 10  |
| 6  | 2.0  | 83  | 0.02             | 13  | 12  |
| 7  | 25   | 199 | 0.86             | 349 | 273 |
| 8  | 8.7  | 47  | 0.12             | 43  | 88  |
| 9  | 2.6  | 45  | 0.02             | 36  | 23  |
| 10 | 2.7  | 34  | 0.08             | 25  | 25  |
| 11 | 4.5  | 226 | 0.37             | 735 | 82  |
| 12 | 0.77 | 95  | 0.82             | 9.2 | 6.0 |
| 13 | 0.65 | 96  | 0.12             | 45  | 19  |
| 14 | 2.1  | 74  | 0.64             | 67  | 41  |

**Epidote Planggenstock**

---

|    |     |     |      |    |     |
|----|-----|-----|------|----|-----|
| 1  | 156 | 105 | 0.27 | 44 | 443 |
| 2  | 82  | 69  | 0.14 | 35 | 257 |
| 3  | 50  | 89  | 0.04 | 27 | 165 |
| 4  | 62  | 44  | 0.10 | 30 | 218 |
| 5  | 84  | 57  | 0.11 | 45 | 299 |
| 6  | 64  | 53  | 0.04 | 33 | 245 |
| 7  | 39  | 48  | 0.02 | 21 | 172 |
| 8  | 35  | 40  | 0.02 | 18 | 158 |
| 9  | 22  | 25  | 0.02 | 15 | 103 |
| 10 | 59  | 47  | 0.02 | 51 | 212 |
| 11 | 48  | 43  | 0.04 | 44 | 181 |
| 12 | 27  | 15  | 0.08 | 29 | 103 |
| 13 | 17  | 15  | 0.02 | 18 | 77  |
| 14 | 46  | 153 | 0.28 | 26 | 142 |
| 15 | 46  | 154 | 0.28 | 27 | 141 |
| 16 | 49  | 185 | 0.40 | 53 | 175 |
| 17 | 44  | 148 | 0.44 | 53 | 164 |
| 18 | 38  | 149 | 0.24 | 21 | 118 |
| 19 | 41  | 142 | 0.22 | 22 | 126 |
| 20 | 49  | 126 | 0.31 | 25 | 146 |
| 21 | 54  | 168 | 0.26 | 28 | 162 |
| 22 | 58  | 154 | 0.31 | 29 | 170 |

---

## References

- Barth, S., Oberli, F., and Meier, M.: ThPb versus UPb isotope systematics in allanite from co-genetic rhyolite and granodiorite: implications for geochronology, *Earth Planet. Sci. Lett.*, 124, 149–159, [https://doi.org/10.1016/0012-821X\(94\)00073-5](https://doi.org/10.1016/0012-821X(94)00073-5), 1994.
- Gregory, C. J., Rubatto, D., Allen, C. M., Williams, I. S., Hermann, J., and Ireland, T.: Allanite micro-geochronology: A LA-ICP-MS and SHRIMP U-Th-Pb study, *Chem. Geol.*, 245, 162–182, <https://doi.org/10.1016/j.chemgeo.2007.07.029>, 2007.
- Hiess, J., Condon, D. J., McLean, N., and Noble, S. R.:  $^{238}\text{U}/^{235}\text{U}$  Systematics in Terrestrial Uranium-Bearing Minerals, *Science* (80-. ), 335, 1610 LP – 1614, <https://doi.org/10.1126/science.1215507>, 2012.
- Peveirelli, V., Ewing, T., Rubatto, D., Wille, M., Berger, A., Villa, I. M., Lanari, P., Pettke, T., and Herwegh, M.: U – Pb geochronology of epidote by laser ablation inductively coupled plasma mass spectrometry (LA-ICP-MS) as a tool for dating hydrothermal-vein formation, *Geochronology*, 3, 123–147, <https://doi.org/10.5194/gchron-3-123-2021>, 2021.
- Peveirelli, V., Berger, A., Mulch, A., Pettke, T., Piccoli, F., and Herwegh, M.: Epidote U-Pb geochronology and H isotope geochemistry trace pre-orogenic hydration of midcrustal granitoids, *Geology*, 50, 1073–1077, <https://doi.org/10.1130/G50028.1>, 2022a.
- Smye, A. J., Roberts, N. M. W., Condon, D. J., Horstwood, M. S. A., and Parrish, R. R.: Characterising the U-Th-Pb systematics of allanite by ID and LA-ICPMS: Implications for geochronology, *Geochim. Cosmochim. Acta*, 135, 1–28, <https://doi.org/10.1016/j.gca.2014.03.021>, 2014.
- Stacey, J. S. and Kramers, J. D.: Approximation of terrestrial lead isotope evolution by a two-stage model, *Earth Planet. Sci. Lett.*, 26, 207–221, [https://doi.org/10.1016/0012-821X\(75\)90088-6](https://doi.org/10.1016/0012-821X(75)90088-6), 1975.
